# Supplementary material
Source: publisher figshare collection journal article supplement (https://karger.figshare.com/ndownloader/files/12315419)
Supplement: Supplementary file 1 [file 12315419]

**Supplement table 4:** meta-regression results of clinical variables and comorbidity rates of CVA in patients with PLMS and controls

| Items | *k* | slope | *p* value |
| --- | --- | --- | --- |
| Mean age | 9 | -0.002 | 0.868 |
| Female proportion | 9 | -0.001 | 0.853 |
| BMI | 9 | -0.006 | 0.884 |
| Mean AHI of PLMS group | 7 | 0.069 | 0.219 |
| Smoker proportion | 9 | 0.001 | 0.914 |

Abbreviation: CVA: cerebrovascular accident; PLMS: periodic limb movement in sleep
